## CORRESPONDENCE

Anesthesiology  
2000; 92:1200  
© 2000 American Society of Anesthesiologists, Inc.  
Lippincott Williams & Wilkins, Inc.

*In Reply:*—The publication of several letters to the editor concerning management of the bearded airway occurred concurrent to the formulation of our correspondence<sup>1</sup> and were regretfully excluded from the discussion and references. This flurry of furry correspondence in the journal *Anaesthesia* highlights the ubiquity of the problem, and also the range of solutions, depending on the resources that are available.<sup>2-7</sup>

**Joel O. Johnson, M.D., Ph.D.**  
Associate Professor  
Department of Anesthesiology and  
Perioperative Medicine  
The University of Missouri  
Columbia, Missouri  
johnsonjo@missouri.edu

Anesthesiology  
2000; 92:1200  
© 2000 American Society of Anesthesiologists, Inc.  
Lippincott Williams & Wilkins, Inc.

## Aseptic Meningitis after Spinal Anesthesia in an Infant

*To the Editor:*—We read with interest the report by Easley *et al.*<sup>1</sup> of aseptic meningitis after spinal anesthesia in an infant. Although the report is a poignant reminder that this complication is a risk when performing spinal anesthesia in any patient, adult or neonate, we have several concerns. First, the differential diagnosis between viral meningitis and aseptic meningitis is, at best, difficult to make. Based on the authors description of the cerebrospinal fluid findings, diagnosis does not rule out viral meningitis.<sup>2</sup> Second, in the concluding paragraph, the authors state that they suspected aseptic meningitis, but could not prove a causal relation.<sup>1</sup> As illustrated in a recent report of two infants who were diagnosed with meningitis—one after and one immediately before placement of a spinal anesthetic—the onset of meningitis may be coincidentally timed with the induction of the spinal anesthetic.<sup>3</sup> In such cases, the causal relation between aseptic meningitis and the spinal anesthetic should be a diagnosis of exclusion. We believe that viral meningitis was not ruled out in the report by Easley *et al.*<sup>1</sup>

**Amr Abouleish, M.D., M.B.A.**  
Associate Professor  
**N. Chai Nguyen, M.D.**  
Assistant Professor

## References

1. Johnson JO, Bradway JA, Blood T: A hairy situation (letter). *ANESTHESIOLOGY* 1999; 91:595
2. Alexander R, Thomas DI: Overcoming the beard (letter). *Anaesthesia* 1999; 54:100
3. Crooke J: The bearded airway (letter). *Anaesthesia* 1999; 54:500
4. Hancock AC: The bearded airway (letter). *Anaesthesia* 1999; 54:408
5. Moore EW, Cowan CM: A close shave (letter). *Anaesthesia* 1999; 54:305
6. Vincent C, Ames WA: The bearded airway (letter). *Anaesthesia* 1998; 53:1034-5
7. Thomas DI: Overcoming the beard (letter). *Anesthesia* 1999; 54:100

(Accepted for publication July 8, 1999.)

**James F. Mayhew, M.D.**  
Professor  
Division of Pediatric Anesthesiology  
University of Texas Medical Branch  
Galveston, Texas  
jfmayhew@utmb.edu

## References

1. Easley RB, George R, Connors D, Tobias JD: Aseptic meningitis after spinal anesthesia in an infant. *ANESTHESIOLOGY* 1999; 91:305-7
2. Prober CG: Infections of the central nervous system, viral meningoencephalitis, Nelson Textbook of Pediatrics, 15th edition. Edited by Behrman RE, Kliegman RM, Arvin AM. Philadelphia, WB Saunders, 1996, pp 713-6
3. Luz G, Buchele H, Innerhofer P, Maurer H: Spinal anaesthesia and meningitis in former preterm infants: Cause-effect? *Paediatr Anaesth* 1999; 9:262-4

(Accepted for publication November 4, 1999.)

## CORRESPONDENCE

Anesthesiology  
2000; 92:1201  
© 2000 American Society of Anesthesiologists, Inc.  
Lippincott Williams & Wilkins, Inc.

*In Reply:*—We appreciate the interest of Dr. Abouliesh *et al.*<sup>1</sup> in our recent case report. We agree that it is not possible to differentiate viral meningitis from aseptic meningitis based on the cerebrospinal fluid findings and do not think that this differentiation is implied in our discussion of the case. More importantly, the suspected diagnosis of aseptic meningitis was subsequently further supported by the inability to isolate a virus from cultures of cerebrospinal fluid or from rectal and nasopharyngeal swabs. Although viral isolation may not always be possible, and the isolation of a virus is not conclusive evidence that the virus is the causative agent of meningitis, we think that this evidence strongly supports our conclusion of aseptic meningitis. Additionally, we were careful to state in the final paragraph that we could not prove a causal relation between the aseptic meningitis and the performance of the spinal anesthesia.

**Joseph D. Tobias, M.D.**  
Professor of Anesthesiology and Pediatrics  
Joseph\_Tobias@muccmail.missouri.edu

Anesthesiology  
2000; 92:1201  
© 2000 American Society of Anesthesiologists, Inc.  
Lippincott Williams & Wilkins, Inc.

**R. Blaine Easley, M.D.**  
**Reggie George, M.D.**  
Resident in Pediatrics  
**Dean Connors, M.D.**  
Assistant Professor of Anesthesiology  
Departments of Pediatrics and  
Anesthesiology  
The University of Missouri  
Department of Child Health  
Columbia, Missouri

## Reference

1. Easley RB, George R, Connors D, Tobias JD: Aseptic meningitis after spinal anesthesia in an infant. *ANESTHESIOLOGY* 1999; 91:305-7

(Accepted for publication November 4, 1999.)

## Aerosolization of Lidocaine

*To the Editor:*—The apparatus described by Dr. Balatbat *et al.*<sup>1</sup> for applying lidocaine to the airway bears an uncanny resemblance to an arrangement that I first described in 1998.<sup>2</sup> I do appreciate, however, that it is not always easy to identify instances of previous publication, even with the most assiduous of literature searches, particularly if the publication in question happens to be correspondence. I say this with confidence because I made the same error myself; the arrangement was originally described by Dr. Tran in 1992.<sup>3</sup> Although others have judged my apparatus to be "more simple and ingenious" than that described by Dr. Tran,<sup>4</sup> I suspect the same cannot be said for the arrangement described by Dr. Balatbat.

Whatever the merits of the various descriptions, it is worth emphasizing that the Tran-Mackenzie-Balatbat spray is a simple, elegant, and effective method for the topical application of drug sprays to mucosal-lined cavities, and is frequently adopted by those who have seen it in action, including otorhinolaryngologists.

**Iain Mackenzie, M.D.**  
Specialist Registrar  
Nuffield Department of Anaesthetics  
John Radcliffe Hospital

Oxford  
Oxfordshire, United Kingdom  
imacke2690@aol.com

## References

1. Balatbat JT, Stocking JE, Rigor BM: Controlled intermittent aerosolization of lidocaine for airway anesthesia. *ANESTHESIOLOGY* 1999; 91:596
2. Mackenzie I: A new method of drug application to the nasal passage. *Anaesthesia* 1998; 53:309-10
3. Tran DQ: A simple device for administration of topical anesthesia to the upper airway. *Anesth Analg* 1992; 74:620-1
4. Bucx MJL: Application of drugs to the nasal passages. *Anaesthesia* 1998; 53:722-3

(Accepted for publication November 30, 1999.)
